# Supplementary material
Source: MDPI journal article supplement (https://www.mdpi.com/2409-515X/9/3/51)
Supplement: s1 [file s1]

**Supplementary table S1: Open-text responses indicating reasons for respondents' preferences for screening**

|                                                    |          |
|----------------------------------------------------|----------|
| <i>In favor of only screening boys (n=13)</i>      |          |
| Boys develop severe symptoms                       | 7 (46%)  |
| Girls develop no/ less severe symptoms             | 3 (23%)  |
| ALD is treatable in boys                           | 2 (15%)  |
| Important to know in case of child wish            | 2 (15%)  |
| Parents can take immediate action after diagnosis  | 1 (8%)   |
| ALD is not treatable in girls                      | 1 (8%)   |
| <i>In favor of screening boys and girls (n=48)</i> |          |
| Helps to provide an early diagnosis                | 13 (27%) |
| Facilitates (early) treatment and monitoring       | 12 (25%) |
| Helps with family planning                         | 8 (17%)  |
| ALD has an impact on both sexes                    | 7 (15%)  |
| Helps make future plans                            | 6 (13%)  |
| Miscellaneous reasons                              | 5 (10%)  |
| No discrimination between sexes                    | 3 (6%)   |
| Helps prevent suffering                            | 2 (4%)   |
| Research and better understanding of the disease   | 2 (4%)   |
| Enables extended family screening for ALD          | 1 (2%)   |

Reasons why respondents indicated that they preferred the indicated type of screening are ordered from most common to least common. Some open-text answers included multiple reasons. Not all respondents explained their choice. ALD: adrenoleukodystrophy.
